# Supplementary material for: Effects of ketamine treatment on suicidal ideation: a qualitative study of patients’ accounts following treatment for depression in a UK ketamine clinic
Source: PubMed Central journal article supplement — BMJ Open. 2019 Aug 15;9(8):e029108. doi: 10.1136/bmjopen-2019-029108 (PMC6701814; doi:10.1136/bmjopen-2019-029108), 2019-08-15
Supplement: bmjopen-2019-029108supp001.pdf [file bmjopen-2019-029108supp001.pdf]

## Consolidated criteria for reporting qualitative studies (COREQ): 32-item checklist

Developed from:

Tong A, Sainsbury P, Craig J. Consolidated criteria for reporting qualitative research (COREQ): a 32-item checklist for interviews and focus groups. *International Journal for Quality in Health Care*. 2007. Volume 19, Number 6: pp. 349 – 357

| No. Item                                       | Guide questions/description                                                                                                                              | Reported on Page #                                                          |
|------------------------------------------------|----------------------------------------------------------------------------------------------------------------------------------------------------------|-----------------------------------------------------------------------------|
| <b>Domain 1: Research team and reflexivity</b> |                                                                                                                                                          |                                                                             |
| <i>Personal Characteristics</i>                |                                                                                                                                                          |                                                                             |
| 1. Inter viewer/facilitator                    | Which author/s conducted the interview or focus group?                                                                                                   | See Manuscript p6                                                           |
| 2. Credentials                                 | What were the researcher's credentials?                                                                                                                  | MSc                                                                         |
| 3. Occupation                                  | What was their occupation at the time of the study?                                                                                                      | Mental Health Nurse                                                         |
| 4. Gender                                      | Was the researcher male or female?                                                                                                                       | Female                                                                      |
| 5. Experience and training                     | What experience or training did the researcher have?                                                                                                     | MSc Clinical Research; extensive clinical experience; interview techniques. |
| <i>Relationship with participants</i>          |                                                                                                                                                          |                                                                             |
| 6. Relationship established                    | Was a relationship established prior to study commencement?                                                                                              | No                                                                          |
| 7. Participant knowledge of the interviewer    | What did the participants know about the researcher? e.g. personal goals, reasons for doing the research                                                 | Professional role – mental health nurse, researcher role in this study      |
| 8. Interviewer characteristics                 | What characteristics were reported about the inter viewer/facilitator? e.g. Bias, assumptions, reasons and interests in the research topic               | None reported. Researcher was also a mental health nurse.                   |
| <b>Domain 2: study design</b>                  |                                                                                                                                                          |                                                                             |
| <i>Theoretical framework</i>                   |                                                                                                                                                          |                                                                             |
| 9. Methodological orientation and Theory       | What methodological orientation was stated to underpin the study? e.g. grounded theory, discourse analysis, ethnography, phenomenology, content analysis | Descriptive, inductive phenomenological approach.                           |
| <i>Participant selection</i>                   |                                                                                                                                                          |                                                                             |

|                                        |                                                                                    |                                             |
|----------------------------------------|------------------------------------------------------------------------------------|---------------------------------------------|
| 10. Sampling                           | How were participants selected? e.g. purposive, convenience, consecutive, snowball | See manuscript p8; purposive sample         |
| 11. Method of approach                 | How were participants approached? e.g. face-to-face, telephone, mail, email        | See manuscript p5                           |
| 12. Sample size                        | How many participants were in the study?                                           | See manuscript p8                           |
| 13. Non-participation                  | How many people refused to participate or dropped out? Reasons?                    | See manuscript p8                           |
| <i>Setting</i>                         |                                                                                    |                                             |
| 14. Setting of data collection         | Where was the data collected? e.g. home, clinic, workplace                         | See manuscript p6                           |
| 15. Presence of non-participants       | Was anyone else present besides the participants and researchers?                  | No                                          |
| 16. Description of sample              | What are the important characteristics of the sample? e.g. demographic data, date  | See manuscript p8                           |
| <i>Data collection</i>                 |                                                                                    |                                             |
| 17. Interview guide                    | Were questions, prompts, guides provided by the authors? Was it pilot tested?      | Guide not attached. Guide was pilot tested. |
| 18. Repeat interviews                  | Were repeat interviews carried out? If yes, how many?                              | No                                          |
| 19. Audio/visual recording             | Did the research use audio or visual recording to collect the data?                | See manuscript p6                           |
| 20. Field notes                        | Were field notes made during and/or after the interview or focus group?            | Yes                                         |
| 21. Duration                           | What was the duration of the interviews or focus group?                            | See manuscript p6                           |
| 22. Data saturation                    | Was data saturation discussed?                                                     | No                                          |
| 23. Transcripts returned               | Were transcripts returned to participants for comment and/or correction?           | See manuscript p6                           |
| <b>Domain 3: analysis and findings</b> |                                                                                    |                                             |
| <i>Data analysis</i>                   |                                                                                    |                                             |
| 24. Number of data coders              | How many data coders coded the data?                                               | See manuscript p7                           |
| 25. Description of the coding tree     | Did authors provide a description of the coding tree?                              | No                                          |
| 26. Derivation of themes               | Were themes identified in advance or derived from the data?                        | Derived from data                           |
| 27. Software                           | What software, if applicable, was used to manage the data?                         | NVIVO version 11                            |
| 28. Participant checking               | Did participants provide feedback on the findings?                                 | No                                          |
| <i>Reporting</i>                       |                                                                                    |                                             |
| 29. Quotations presented               | Were participant quotations presented to illustrate the themes/findings? Was each  | Yes                                         |

|                                  |                                                                        |                             |
|----------------------------------|------------------------------------------------------------------------|-----------------------------|
|                                  | quotation identified? e.g. participant number                          |                             |
| 30. Data and findings consistent | Was there consistency between the data presented and the findings?     | Yes                         |
| 31. Clarity of major themes      | Were major themes clearly presented in the findings?                   | See manuscript: Table 4 p16 |
| 32. Clarity of minor themes      | Is there a description of diverse cases or discussion of minor themes? | See manuscript              |
